# Supplementary material for: Bayesian machine learning analysis of single-molecule fluorescence colocalization images
Source: eLife. 2022 Mar 23;11:e73860. doi: 10.7554/eLife.73860 (PMC9183235; doi:10.7554/eLife.73860)
Supplement: Supplementary file 2. [file elife-73860-supp2.xlsx]

## Sheet: Description
	Supplementary File 2: Randomized simulation parameters and corresponding fit values
N	Number of on-target AOIs
Nc	Number of control off-target AOIs
F	Number of frames
P	Number of pixels along x- and y-axes of an AOI
height	Spot intensity
width	Spot width
background	Image background
offset	Camera offset
pi	Average target-specific binding probability
lamda	Non-specific binding rate
proximity	Proximity parameter
p(specific)	Average probability of there being any target-specific spot in an AOI image
95% UL	95% CI upper-limit
95% LL	95% CI lower-limit
SNR	Signal-to-noise ratio
MCC	Matthews correlation coefficient
TP	True positives
FN	False negatives
TN	True negatives
FP	False positives

## Sheet: Simulation inputs
	width	gain	pi	lamda	proximity	offset	height	background	N	F	Nc	Fc	P
seed0	1.4	17.044	0.1456	0.5113	0.362	90	3000	150	5	500	5	500	14
seed1	1.4	3.5529	0.1358	0.4954	0.3798	90	3000	150	5	500	5	500	14
seed2	1.4	19.1647	0.1812	0.6697	0.3233	90	3000	150	5	500	5	500	14
seed3	1.4	5.5213	0.0904	0.6257	0.2262	90	3000	150	5	500	5	500	14
seed4	1.4	5.4849	0.0132	0.0665	0.3606	90	3000	150	5	500	5	500	14
seed5	1.4	12.8351	0.0977	0.7399	0.5689	90	3000	150	5	500	5	500	14
seed6	1.4	16.0735	0.1629	0.0005	0.4651	90	3000	150	5	500	5	500	14
seed7	1.4	7.1528	0.0154	0.5359	0.3463	90	3000	150	5	500	5	500	14
seed8	1.4	5.3074	0.368	0.0852	0.299	90	3000	150	5	500	5	500	14
seed9	1.4	9.7971	0.0748	0.0064	0.4011	90	3000	150	5	500	5	500	14
seed10	1.4	11.8566	0.0545	0.8133	0.5294	90	3000	150	5	500	5	500	14
seed11	1.4	9.5952	0.083	0.1847	0.4048	90	3000	150	5	500	5	500	14
seed12	1.4	10.0168	0.0914	0.0109	0.3499	90	3000	150	5	500	5	500	14
seed13	1.4	5.9212	0.0962	0.1857	0.2922	90	3000	150	5	500	5	500	14
seed14	1.4	3.0297	0.1037	0.2711	0.3023	90	3000	150	5	500	5	500	14
seed16	1.4	7.8689	0.0732	0.4095	0.4631	90	3000	150	5	500	5	500	14

## Sheet: seed0
	Mean	95% LL	95% UL	True
gain	17.178	17.1291	17.2287	17.044
proximity	0.3765	0.3557	0.397	0.362
lamda	0.4836	0.4665	0.5019	0.5113
pi	0.1736	0.1578	0.1898	0.1456
Keq	0.2101	0.1873	0.2343
SNR	2.47			2.4089
MCC	0.951
Recall	0.9926
Precision	0.9268
TN	2060
FP	32
FN	3
TP	405
p(specific)	0.9787	0.872	0.9938

## Sheet: seed1
	Mean	95% LL	95% UL	True
gain	3.5867	3.5767	3.5961	3.5529
proximity	0.3674	0.3456	0.3914	0.3798
lamda	0.4856	0.4689	0.5047	0.4954
pi	0.135	0.1211	0.1491	0.1358
Keq	0.1561	0.1377	0.1752
SNR	5.466			5.2761
MCC	0.9649
Recall	0.9882
Precision	0.9516
TN	2145
FP	17
FN	4
TP	334
p(specific)	0.9755	0.7639	0.9929

## Sheet: seed2
	Mean	95% LL	95% UL	True
gain	19.4107	19.3547	19.4632	19.1647
proximity	0.3515	0.3318	0.3701	0.3233
lamda	0.6385	0.6187	0.6582	0.6697
pi	0.1874	0.1714	0.2035	0.1812
Keq	0.2307	0.2069	0.2555
SNR	2.3398			2.2717
MCC	0.9459
Recall	0.9887
Precision	0.9237
TN	2023
FP	36
FN	5
TP	436
p(specific)	0.976	0.8447	0.9927

## Sheet: seed3
	Mean	95% LL	95% UL	True
gain	5.5532	5.5378	5.5676	5.5213
proximity	0.2443	0.2281	0.2613	0.2262
lamda	0.6346	0.6157	0.6563	0.6257
pi	0.0987	0.0865	0.1108	0.0904
Keq	0.1095	0.0946	0.1245
SNR	4.3645			4.2324
MCC	0.9604
Recall	0.9837
Precision	0.9453
TN	2240
FP	14
FN	4
TP	242
p(specific)	0.9775	0.7627	0.9931

## Sheet: seed4
	Mean	95% LL	95% UL	True
gain	5.5293	5.5125	5.5449	5.4849
proximity	0.4348	0.3498	0.521	0.3606
lamda	0.0714	0.0646	0.0788	0.0665
pi	0.0166	0.0114	0.0218	0.0132
Keq	0.0169	0.0115	0.0222
SNR	4.2259			4.2464
MCC	0.9033
Recall	0.9737
Precision	0.8409
TN	2455
FP	7
FN	1
TP	37
p(specific)	0.9565	0.7799	0.9819

## Sheet: seed5
	Mean	95% LL	95% UL	True
gain	12.9258	12.8871	12.9629	12.8351
proximity	0.5949	0.5373	0.6498	0.5689
lamda	0.7449	0.722	0.768	0.7399
pi	0.097	0.0842	0.1098	0.0977
Keq	0.1076	0.0919	0.1233
SNR	2.849			2.7759
MCC	0.8875
Recall	0.9449
Precision	0.8544
TN	2226
FP	38
FN	13
TP	223
p(specific)	0.8751	0.4751	0.9554

## Sheet: seed6
	Mean	95% LL	95% UL	True
gain	16.0932	16.0502	16.1367	16.0735
proximity	0.4585	0.437	0.4796	0.4651
lamda	0.0004	0	0.001	0.0005
pi	0.1667	0.1518	0.181	0.1629
Keq	0.2003	0.1789	0.2209
SNR	2.465			2.4806
MCC	0.997
Recall	1
Precision	0.995
TN	2097
FP	2
FN	0
TP	401
p(specific)	1	0.9997	1

## Sheet: seed7
	Mean	95% LL	95% UL	True
gain	7.2267	7.2047	7.2469	7.1528
proximity	0.4287	0.294	0.5697	0.3463
lamda	0.5252	0.5072	0.544	0.5359
pi	0.0107	0.0059	0.0159	0.0154
Keq	0.0108	0.0059	0.0161
SNR	3.7649			3.7185
MCC	0.8959
Recall	0.9286
Precision	0.8667
TN	2468
FP	4
FN	2
TP	26
p(specific)	0.6863	0.4836	0.8453

[truncated: 8 more sheets: seed8, seed9, seed10, seed11, seed12, seed13, seed14, seed16]
